# Supplementary material for: Characterisation of the membrane affinity of an isoniazide peptide conjugate by tensiometry, atomic force microscopy and sum-frequency vibrational spectroscopy, using a phospholipid Langmuir monolayer model
Source: Royal Society of Chemistry journal article supplement (doi:10.1039/c002737e), 2010-01-01
Supplement: c002737e.pdf [file c002737e.pdf]

## Supporting material for

### Characterisation of the membrane affinity of an isoniazide peptide conjugate by tensiometry, atomic force microscopy and sum-frequency vibrational spectroscopy, using a phospholipid Langmuir monolayer model

*Katalin Hill, Csanád Botond Péntzes, Donát Schnöller, Kata Horváti, Szilvia Bősze, Ferenc Hudecz, Tamás Keszthelyi, Éva Kiss*

**Table S1.** Fitting parameters for the sum-frequency *ssp* spectra of Phospholipon on pure water and for Phospholipon after INH peptide conjugate penetration at 15 and 20 mN/m.

|                                                                               | CH <sub>2</sub> (s) | CH <sub>3</sub> (s) | CH <sub>2</sub> (as) | CH <sub>3</sub> (FR) | CH <sub>3</sub> (as) | $A_{NR}$ | $\varphi_{NR}$ (radian) |
|-------------------------------------------------------------------------------|---------------------|---------------------|----------------------|----------------------|----------------------|----------|-------------------------|
| $\omega_m$ (cm <sup>-1</sup> )                                                | 2850                | 2878                | 2900                 | 2938                 | 2961                 |          |                         |
| $\Gamma_m$ (cm <sup>-1</sup> )                                                | 15                  | 6.7                 | 15                   | 8.5                  | 10                   |          |                         |
| Area/molecule (Å <sup>2</sup> )                                               |                     |                     |                      |                      |                      |          |                         |
| <b>Phospholipon spread onto pure water subphase</b>                           |                     |                     |                      |                      |                      |          |                         |
| 40                                                                            | 2.56                | 7.14                | 0.93                 | 6.76                 | -3.11                | 0.07     | -0.99                   |
| 41                                                                            | 2.48                | 6.99                | 0.84                 | 6.52                 | -3.23                | 0.08     | -1.05                   |
| 41                                                                            | 2.60                | 6.88                | 0.94                 | 6.47                 | -3.10                | 0.08     | -1.23                   |
| 42                                                                            | 2.87                | 6.31                | 0.99                 | 5.97                 | -2.76                | 0.09     | -1.28                   |
| 44                                                                            | 2.78                | 6.47                | 1.01                 | 6.36                 | -2.77                | 0.09     | -1.21                   |
| 45                                                                            | 2.99                | 6.29                | 1.12                 | 6.15                 | -2.74                | 0.09     | -1.29                   |
| 50                                                                            | 3.37                | 5.74                | 1.30                 | 5.81                 | -2.62                | 0.10     | -1.47                   |
| 52                                                                            | 3.58                | 5.40                | 1.36                 | 5.46                 | -2.33                | 0.11     | -1.49                   |
| 59                                                                            | 3.58                | 4.68                | 1.11                 | 4.69                 | -2.05                | 0.11     | -1.57                   |
| 62                                                                            | 3.81                | 4.42                | 1.11                 | 4.55                 | -2.13                | 0.11     | -1.58                   |
| 70                                                                            | 3.86                | 3.80                | 1.45                 | 4.05                 | -1.66                | 0.12     | -1.61                   |
| 86                                                                            | 4.30                | 2.87                | 1.40                 | 3.29                 | -1.36                | 0.12     | -1.63                   |
| 98                                                                            | 2.46                | 1.29                | 2.37                 | 2.09                 | -1.26                | 0.11     | -2.13                   |
| 108                                                                           | 0.00                | 0.00                | 0.00                 | 0.00                 | 0.00                 | 0.00     | 0.00                    |
| <b>Phospholipon following penetration of INH peptide conjugate at 15 mN/m</b> |                     |                     |                      |                      |                      |          |                         |
| 52                                                                            | 2.61                | 6.29                | 0.71                 | 6.14                 | -2.85                | -0.05    | 1.62                    |
| 52                                                                            | 3.03                | 6.61                | 0.82                 | 6.35                 | -2.69                | 0.02     | -1.20                   |
| 59                                                                            | 3.03                | 5.82                | 1.02                 | 5.56                 | -2.15                | -0.02    | 0.84                    |
| 66                                                                            | 2.74                | 5.16                | 1.38                 | 4.96                 | -1.79                | -0.04    | 0.45                    |
| 71                                                                            | 2.53                | 4.47                | 1.45                 | 4.27                 | -1.93                | -0.06    | 0.08                    |
| 81                                                                            | 1.91                | 3.63                | 1.23                 | 3.47                 | -2.69                | -0.12    | -0.39                   |
| 95                                                                            | 1.74                | 3.23                | 2.70                 | 3.18                 | 0.34                 | -0.11    | 0.42                    |
| 110                                                                           | 0.84                | 2.44                | 2.20                 | 2.46                 | -1.09                | -0.15    | 0.04                    |
| <b>Phospholipon following penetration of INH peptide conjugate at 20 mN/m</b> |                     |                     |                      |                      |                      |          |                         |
| 50                                                                            | 2.41                | 6.39                | 1.24                 | 6.17                 | -2.75                | 0.06     | -1.39                   |
| 50                                                                            | 2.63                | 6.40                | 0.67                 | 6.28                 | -2.82                | 0.02     | -1.48                   |
| 52                                                                            | 2.73                | 6.37                | 0.77                 | 6.17                 | -2.64                | 0.02     | -1.90                   |
| 56                                                                            | 2.80                | 5.78                | 1.19                 | 5.74                 | -2.31                | -0.03    | 0.64                    |
| 62                                                                            | 2.55                | 5.00                | 1.44                 | 5.01                 | -2.03                | -0.05    | 0.10                    |
| 72                                                                            | 1.87                | 3.63                | 0.82                 | 3.71                 | -2.90                | -0.11    | -0.52                   |
| 80                                                                            | 1.46                | 3.64                | 1.00                 | 3.57                 | -2.75                | -0.12    | -0.38                   |
| 90                                                                            | 1.24                | 3.12                | 1.49                 | 3.00                 | -2.04                | -0.13    | -0.18                   |
| 98                                                                            | 1.05                | 2.85                | 2.48                 | 2.70                 | 0.84                 | -0.12    | 0.41                    |
| 109                                                                           | 0.57                | 2.03                | 2.68                 | 2.20                 | 1.12                 | -0.13    | 0.65                    |
